# Supplementary material for: Investigating the causal relationship between physical activity and incident knee osteoarthritis: a two-sample Mendelian randomization study
Source: PubMed Central journal article supplement (PMC10796638; doi:10.1038/s41598-024-52175-4), 2024-01-18
Supplement: 41598_2024_52175_MOESM1_ESM.pdf [file 41598_2024_52175_MOESM1_ESM.pdf]

# Investigating the causal relationship between physical activity and incident knee osteoarthritis: A two-sample Mendelian randomization study

Liufang Huang<sup>1</sup> Yuling Zhang<sup>1</sup> Qian Li<sup>1</sup>

Affiliations:

<sup>1</sup> Department of Rehabilitation Medicine, People's Hospital of Guanghan City

Table 1. The included SPNs

| SPNs        |
|-------------|
| rs10821758  |
| rs1160545   |
| rs1265762   |
| rs13201721  |
| rs144949097 |
| rs1625595   |
| rs1691471   |
| rs370935521 |
| rs385301    |
| rs4352559   |
| rs4656648   |
| rs4865512   |
| rs568546    |
| rs7920171   |
| rs8094118   |
| rs9420      |
| rs9903845   |

SPNs: single nucleotide polymorphism
